# Supplementary material for: Assembling sulfur spheres on carbon fiber with graphene coated hybrid bulk electrodes for lithium sulfur batteries
Source: Royal Society of Chemistry journal article supplement (doi:10.1039/c4ra09763g), 2014-01-01
Supplement: c4ra09763g1.pdf [file c4ra09763g1.pdf]

Supporting Information

## **Assembling Sulfur Spheres on Carbon Fiber with Graphene Coated Hybrid Bulk Electrodes for Lithium Sulfur Batteries**

*Zhi-Zheng Yang, Hui-Yuan Wang,\* Xiao-Bin Zhong, Wen Qi, Bang-Yong Wang and  
Qi-Chuan Jiang*

### **Synthesis of Graphene Oxide**

Graphite flakes (Alfa, cat #43209, 325 mesh flakes) were oxidized using the improved method.<sup>1</sup> In a typical procedure to synthesize GO, 360 mL H<sub>2</sub>SO<sub>4</sub> and 40 mL H<sub>3</sub>PO<sub>4</sub> were added to the mixture of 2.0 g graphite flakes and 18.0 g KMnO<sub>4</sub>. After stirred for 30 min at room temperature, the reactant was then heated in an oil bath at 50 °C for 12 h. After cooled to room temperature, the gray mixture was added with 400 mL ice and 5 mL 30% H<sub>2</sub>O<sub>2</sub>. After the supernatant was decanted away by centrifuging, the yellow precipitation was washed with 400 mL 15% HCl to dissolve the residual MnO<sub>2</sub>. After centrifuged and washed with deionized water for several times, the pH of the supernatant was neutral. During the centrifugation process, the low-speed centrifugation was conducted to purify the GO nanosheets. The precipitation was dispersed with 1000 mL deionized water, and then dried in a vacuum freeze-dryer. A yellow flocculent GO aerogel was achieved after dried for 12 h under a vacuum degree of 10 Pa at 35 °C below the ice point.

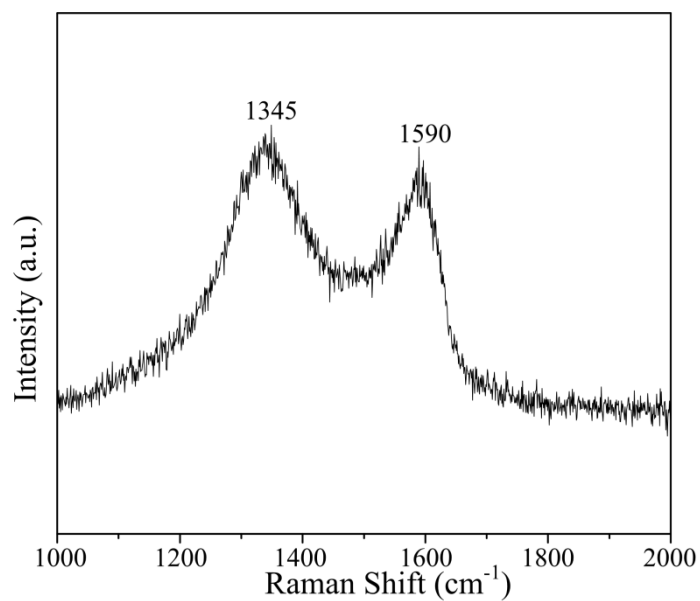

Figure 1s Raman spectrum of the CFS@G bulk electrode. The Raman spectroscopy shows that the two remarkable peaks around 1345 and 1590  $\text{cm}^{-1}$  can be attributed to D band arising from the defects and disorders in carbonaceous material and G band associated with the  $E_{2g}$  mode of graphite. The intensity ratio ( $I_D/I_G$ ) of the two bands is about 1.07.

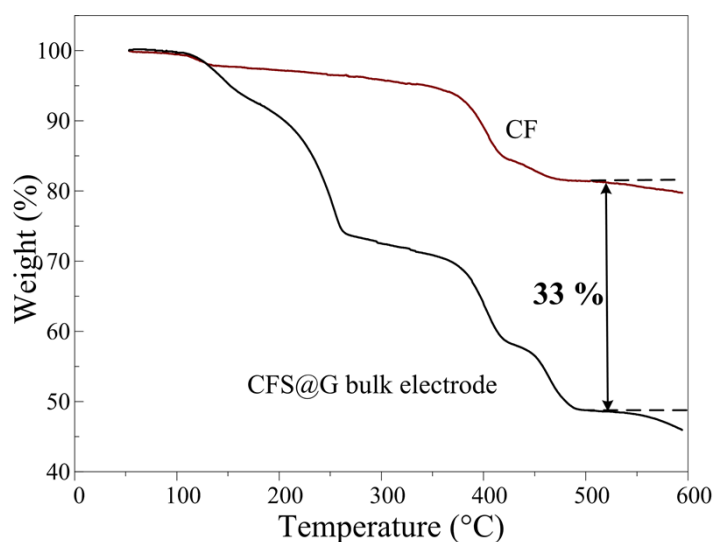

Figure 2s TGA curves of the CF and CFS@G bulk electrode.

[1] D. C. Marcano, D. V. Kosynkin, J. M. Berlin, A. Sinitskii, Z. Sun, A. Slesarev, L.

B. Alemany, W. Lu and J. M. Tour, ACS Nano 2010, 4, 4806-4814.
